# Supplementary material for: In Vivo Production of Monoclonal Antibodies by Gene Transfer via Electroporation Protects against Lethal Influenza and Ebola Infections
Source: Mol Ther Methods Clin Dev. 2017 Sep 20;7:74–82. doi: 10.1016/j.omtm.2017.09.003 (PMC5633264; doi:10.1016/j.omtm.2017.09.003)
Supplement: Document S1. Supplemental Materials and Methods and Figures S1–S7 [file mmc1.pdf]

**OMTM, Volume 7**

## **Supplemental Information**

### **In Vivo Production of Monoclonal Antibodies by Gene Transfer via Electroporation Protects against Lethal Influenza and Ebola Infections**

**Chasity D. Andrews, Yang Luo, Ming Sun, Jian Yu, Arthur J. Goff, Pamela J. Glass, Neal N. Padte, Yaoxing Huang, and David D. Ho**

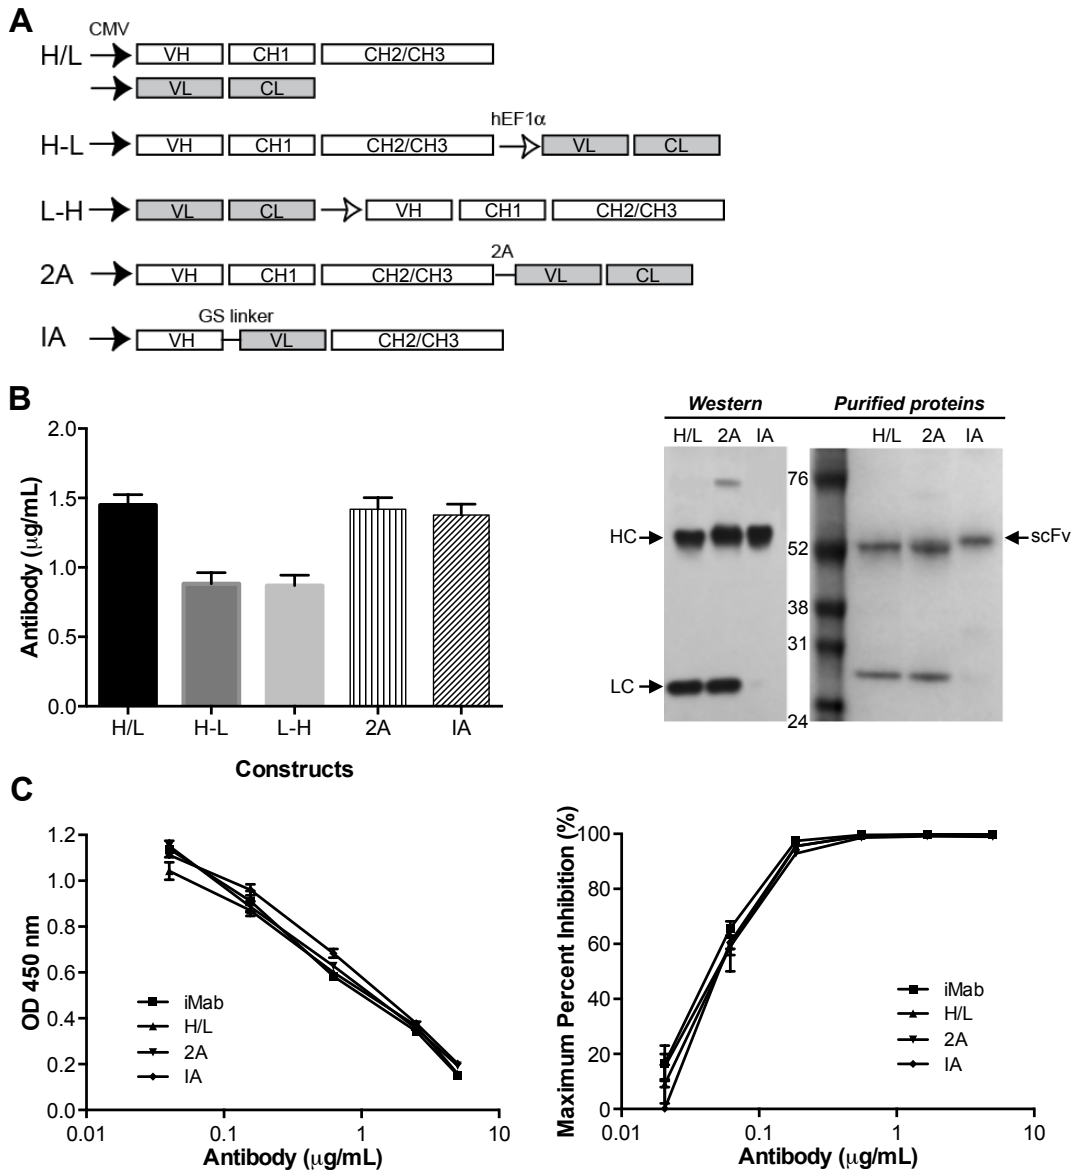

**Figure S1**

#### 5A8 expression cassettes and *in vitro* characterizations.

(A) Schematic representation of mAb transgene configurations (heavy chain genes shown in white and light chain shown in gray) in the pVAX1 vector. Cytomeglovirus (CMV) and human elongation factor-1 alpha (hEF1 $\alpha$ ) promoters are indicated by closed black or open white arrows, respectively. The 2A cassette contains H- and L-chain genes separated by a furin cleavage site coupled with a P2A self-processing peptide (2A). The immunoadhesin (IA) contains a single-chain variable fragment (scFv) fused to the Fc region. (B) Left panel: *In vitro* 5A8 expression in supernatant 72 hours after pDNA transfection of 293A cells measured by CD4 binding ELISA (mean  $\pm$  SEM). Right panel: Western blot of cell culture supernatants detected by anti-mouse HRP and mAbs purified from supernatants were resolved by SDS-PAGE and visualized with Coomassie Blue. The faint ~80kDa band detected in the 2A samples by Western blot is unprocessed antibody. Molecular weight ladder represents kDa. (C) Left panel: Purified mAbs compete with iMab-HRP for sCD4 binding. Right panel: Purified mAbs neutralize HIV-1 pseudotyped virus tested in TZM-bl cells.

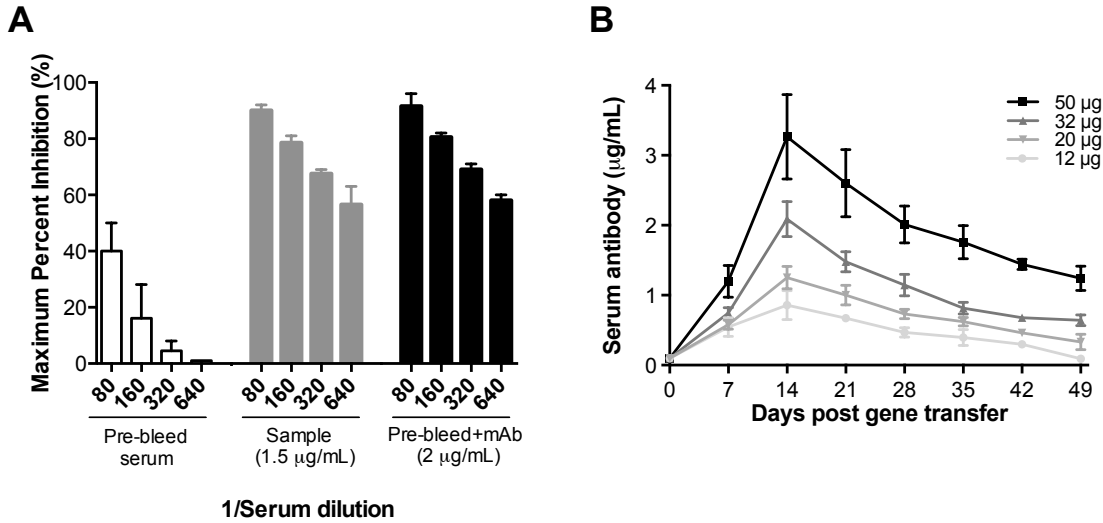

**Figure S2**

**EP delivery of pDNA results in functional dose-dependent serum mAb in mice.**

**(A)** Mice were administered 50 µg H/L 5A8 pDNA in the pVAX1 vector followed by EP. To verify functional activity of the expressed mAb, maximum percent inhibition (MPI) measured by pseudotyped HIV-1 neutralization in TZM-bl cells was compared between serially diluted pre-bleed serum, serum samples taken after DNA/EP, and pre-bleed serum mixed with *in vitro* produced mAb. Mouse serum prior to gene transfer (pre-bleed) was evaluated for antibody neutralization of HIV-1, showing non-specific activity at low serum dilutions. Endogenously expressed mAb retains functional activity comparable to *in vitro* produced mAb. **(B)** mAb expression is pDNA dose-dependent. BALB/c mice (n=6) were injected with 12, 20, 32 or 50 µg of H/L 5A8 pDNA in the pVAX1 vector followed by EP. Serum was collected weekly and mAb concentration was determined by sCD4 binding ELISA. All data are presented as mean ± SEM.

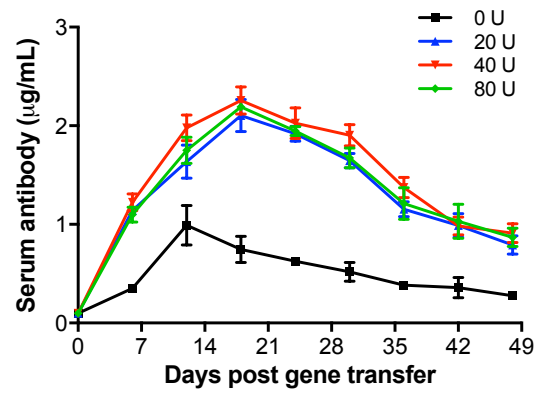

**Figure S3**

**Hyaluronidase pretreatment enhances mAb expression.**

BALB/c mice (n=4-5) were pretreated with 20, 40 or 80 U of hyaluronidase or saline (0 U) as a control 2 hours prior to administration of 20 µg of H/L 5A8 pDNA in the pVAX1 vector followed by EP. Serum was collected weekly and mAb concentration was determined by sCD4 binding ELISA. Antibody expression was evaluated by area-under-the curve measurements during the 48-day period studied. All data are presented as mean  $\pm$  SEM.

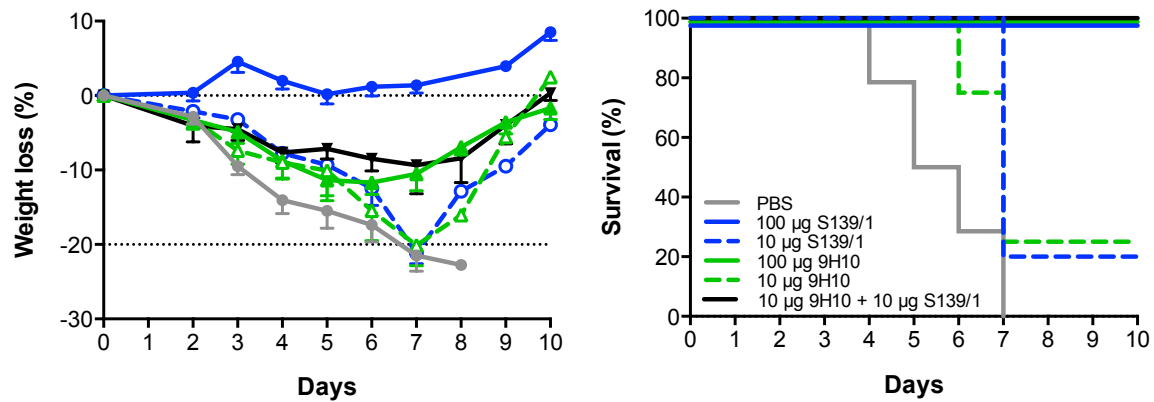

**Figure S4**

**Passive administration of anti-influenza mAbs in mice defines the partially protective dose against influenza challenge.**

BALB/c mice (n=3-5) were passively administered mAb via the intraperitoneal route one day prior to influenza challenge. Mice were challenged on day 0 with 13 MLD<sub>50</sub> of H3N2 (A/Aichi/2/68) delivered intranasally. Left panel: mean weight loss (%) ± SEM compared to day 0. Right panel: survival (%) as depicted in Kaplan-Meier plots following challenge.

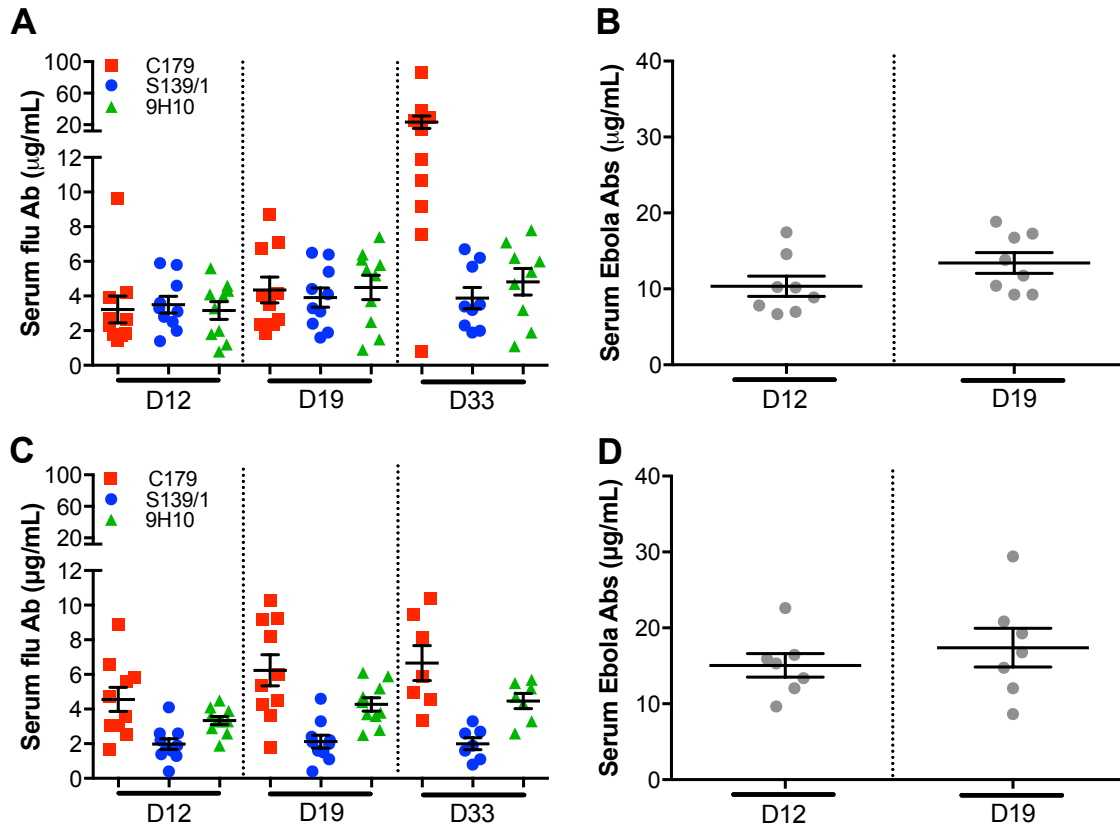

**Figure S5**

**Serum mAb concentrations from mice challenged with group 1 or group 2 influenza viruses.**

Mice were administered pDNA followed by EP and challenged as described in Fig. 3. mAb expression from mice challenged with (A-B) H1N1 and (C-D) H3N2. (A, C) Individual mAb concentrations for C179, S139/1 and 9H10. (B, D) Total anti-Ebola mAb concentrations. Each symbol represents an individual animal and error bars indicate mean ± SEM.

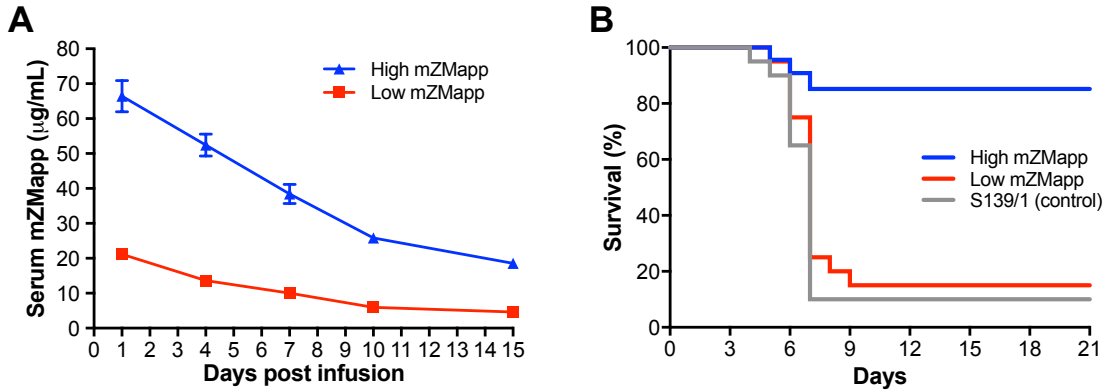

**Figure S6**

**Passive infusion of high-dose mZMapp protects mice from Ebola challenge.**

**(A)** The pharmacokinetic properties of mZMapp were initially evaluated in BALB/c mice. Mice (n=6/group) were infused via the intraperitoneal route with high dose mZMapp (40 μg/mAb; 120 μg total; ~6 mg/kg total) or low dose mZMapp (10 μg/mAb, 30 μg total; ~1.5 mg/kg total) on day 0. Blood was collected at the indicated time points and total mZMapp concentrations were evaluated by GP binding ELISA. Mean ± SEM are shown. **(B)** In a separate experiment, mice (n=20/group) were infused with a low or high dose of mZMapp or an anti-influenza mAb, S139/1 (30 μg total) as a control, one day prior to intraperitoneal challenge with 100 PFU mouse-adapted Ebola virus. Mice were monitored for lethality for 21 days. The Kaplan-Meier plot depicting survival is shown.

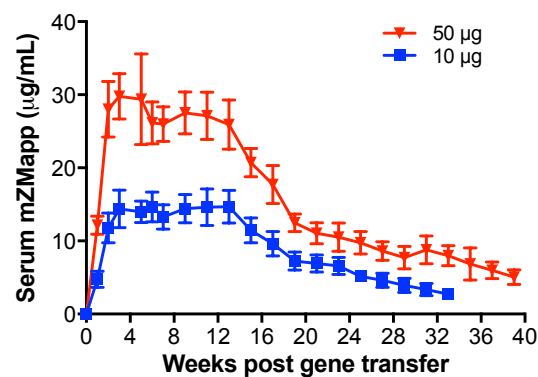

**Figure S7**

**Duration of mZMapp expression following pDNA/EP administration.**

BALB/c mice (n=6-9) were pretreated with 20 U of hyaluronidase and administered 10 or 50 µg H/L gWiz pDNA encoding each 13C6, 2G4 and 4G7 at distinct sites followed by EP. Total serum mAb concentrations were measured by GP-binding ELISAs. All data are represented as mean  $\pm$  SEM.

## **Supplemental Methods**

### **5A8 / 5A8-like Ab *in vitro* expression**

5A8 constructs were evaluated for mAb expression by transient transfection in 293A cells using 5 µg/mL polyethylenimine and 1 µg pDNA. Transfected cells were maintained in Hybridoma-SFM medium for 72 hours. CD4 binding ELISA was used to quantify 5A8 in culture supernatants. Culture supernatants were collected, filtered, purified using Protein G Plus Agarose (Pierce). Eluted mAbs were concentrated by centrifugation (Millipore). mAbs were analyzed by SDS-PAGE visualized with Simply Blue and Western blot detected with anti-mouse HRP.

### **5A8 assessment for soluble CD4 binding in competition ELISA**

*In vitro* produced 5A8 was assessed for its ability to compete with HRP-labeled iMab for soluble CD4 binding as previously described<sup>1</sup>.

### **HIV-1 pseudovirus-based *in vitro* neutralization assays**

Molecular cloned Env-pseudotyped virus G16 was prepared<sup>2</sup> and neutralization was assessed using TZM-bl cells (NIH AIDS Research and Reference Reagent Program, Division of AIDS, NIAID, NIH) with a luciferase-based assay as previously described<sup>1</sup>.

## **Supplemental References**

1. Seaman, MS, Janes, H, Hawkins, N, Grandpre, LE, Devoy, C, Giri, A, *et al.* (2010). Tiered categorization of a diverse panel of HIV-1 Env pseudoviruses for assessment of neutralizing antibodies. *Journal of virology* **84**: 1439-1452.
2. Sun, M, Pace, CS, Yao, X, Yu, F, Padte, NN, Huang, Y, *et al.* (2014). Rational design and characterization of the novel, broad and potent bispecific HIV-1 neutralizing antibody iMabm36. *J Acquir Immune Defic Syndr* **66**: 473-483.
